# Supplementary material
Source: Springer Nature journal article supplement (https://www.springermedizin.de/resource/supplementary/12968_2010_2015_MOESM2_ESM.pdf/9581110)

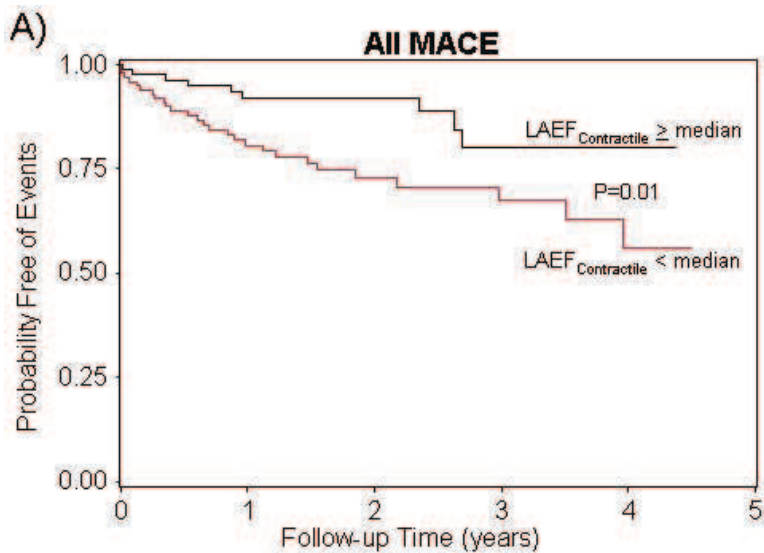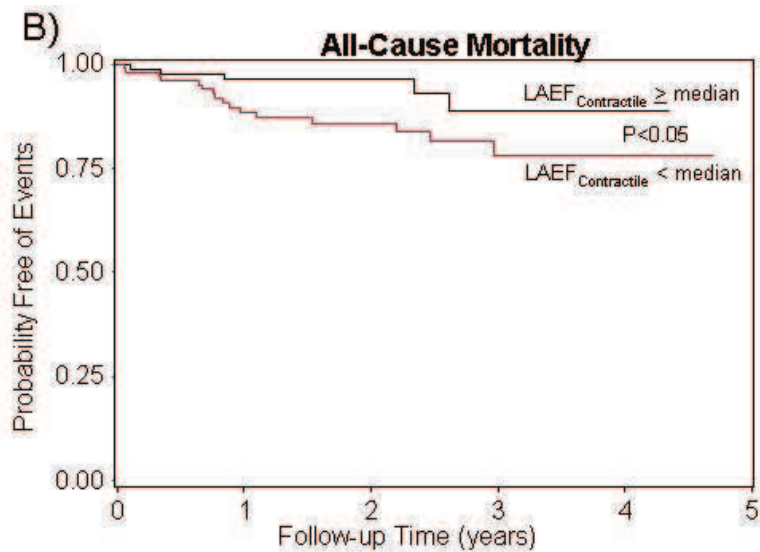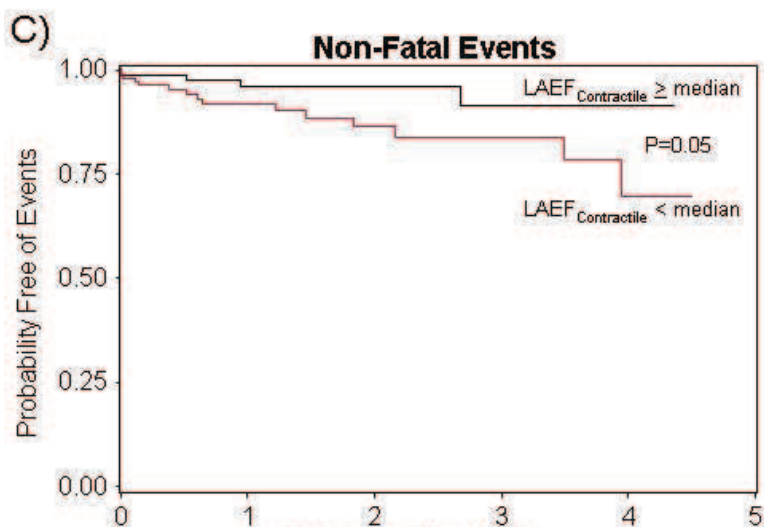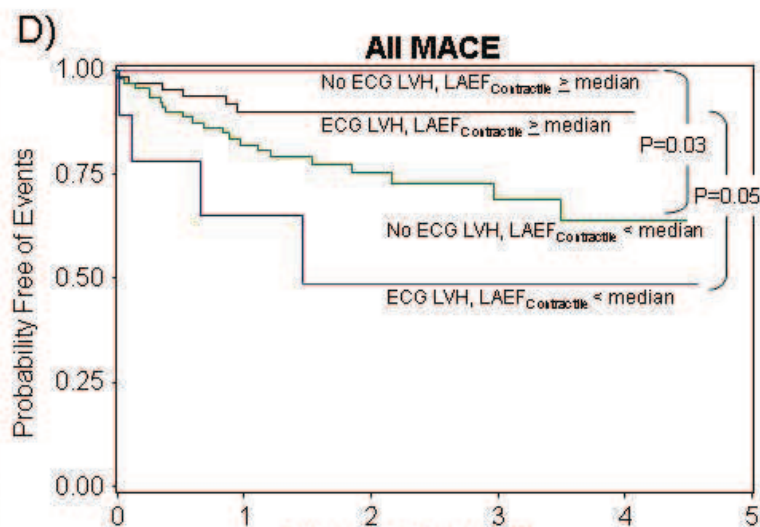

Supplement: MOESM2 [file 9581110]
